# Supplementary material
Source: PubMed Central journal article supplement (PMC4346099)
Supplement: NIHMS664710-supplement-Supplemental.pdf [file NIHMS664710-supplement-Supplemental.pdf]

## SUPPLEMENTAL MATERIAL

### A Twelve-SNP Genetic Risk Score Identifies Individuals at Increased Risk for Future Atrial Fibrillation and Stroke

Hayato Tada, MD<sup>1,2,3\*</sup>; Dov Shiffman, PhD<sup>4\*</sup>; J. Gustav Smith, MD, PhD<sup>5</sup>; Marketa Sjögren, PhD<sup>6</sup>; Steven A. Lubitz, MD, MPH<sup>1,7</sup>; Patrick T. Ellinor, MD, PhD<sup>1,3,7</sup>; Judy Z. Louie, MSc<sup>4</sup>; Joseph J. Catanese, MSc<sup>4</sup>; Gunnar Engström, MD, PhD<sup>6</sup>; James J. Devlin, PhD<sup>4</sup>; Sekar Kathiresan, MD<sup>1,2,3\*</sup>; Olle Melander, MD, PhD<sup>6,8\*</sup>

<sup>1</sup>Center for Human Genetic Research and Cardiovascular Research Center, Massachusetts General Hospital, Boston, Massachusetts;

<sup>2</sup>Broad Institute, Program in Medical and Population Genetics, Cambridge, Massachusetts;

<sup>3</sup>Department of Medicine, Harvard Medical School, Boston, Massachusetts;

<sup>4</sup>Celera, A Quest Diagnostics Company, Alameda, California;

<sup>5</sup>Department of Cardiology, Lund University, Lund, Sweden;

<sup>6</sup>Department of Clinical Sciences, Lund University, Malmö, Sweden;

<sup>7</sup>Cardiac Arrhythmia Service, Massachusetts General Hospital, Boston, Massachusetts;

<sup>8</sup>Department of Internal Medicine, Skåne University Hospital, Malmö, Sweden;

\*These four authors contributed equally to this manuscript.

## Contents

|                                                                                                                                                                   |   |
|-------------------------------------------------------------------------------------------------------------------------------------------------------------------|---|
| <b>Supplemental Figure I</b> . A locus zoom on 4q25 .....                                                                                                         | 2 |
| <b>Supplemental Figure II</b> . A comparison of risk estimates for the 12 SNPs from the literature versus those observed in the Malmo Diet and Cancer Study ..... | 3 |
| <b>Supplemental Figure III</b> . Cumulative incident atrial fibrillation events according to AF-GRS .....                                                         | 4 |
| <b>Supplemental Table I</b> . Linkage disequilibrium ( $r^2$ ) between SNPs in the 4q25 locus .....                                                               | 5 |
| <b>Supplemental Table II</b> . Prevalence and contributed weight of each SNP to the AF-GRS in each GRS-quintile .....                                             | 6 |
| <b>Supplemental Table III</b> . Risk estimates for atrial fibrillation risk factors .....                                                                         | 7 |
| <b>Supplemental Table IV</b> . Stroke event rates according to median age, AF-GRS group, and hypertension .....                                                   | 8 |
| <b>Supplemental Table V</b> . Risk of likely cardioembolic stroke in patients with AF .....                                                                       | 9 |

# Supplemental Figure I . A locus zoom on 4q25

Plotted SNPs

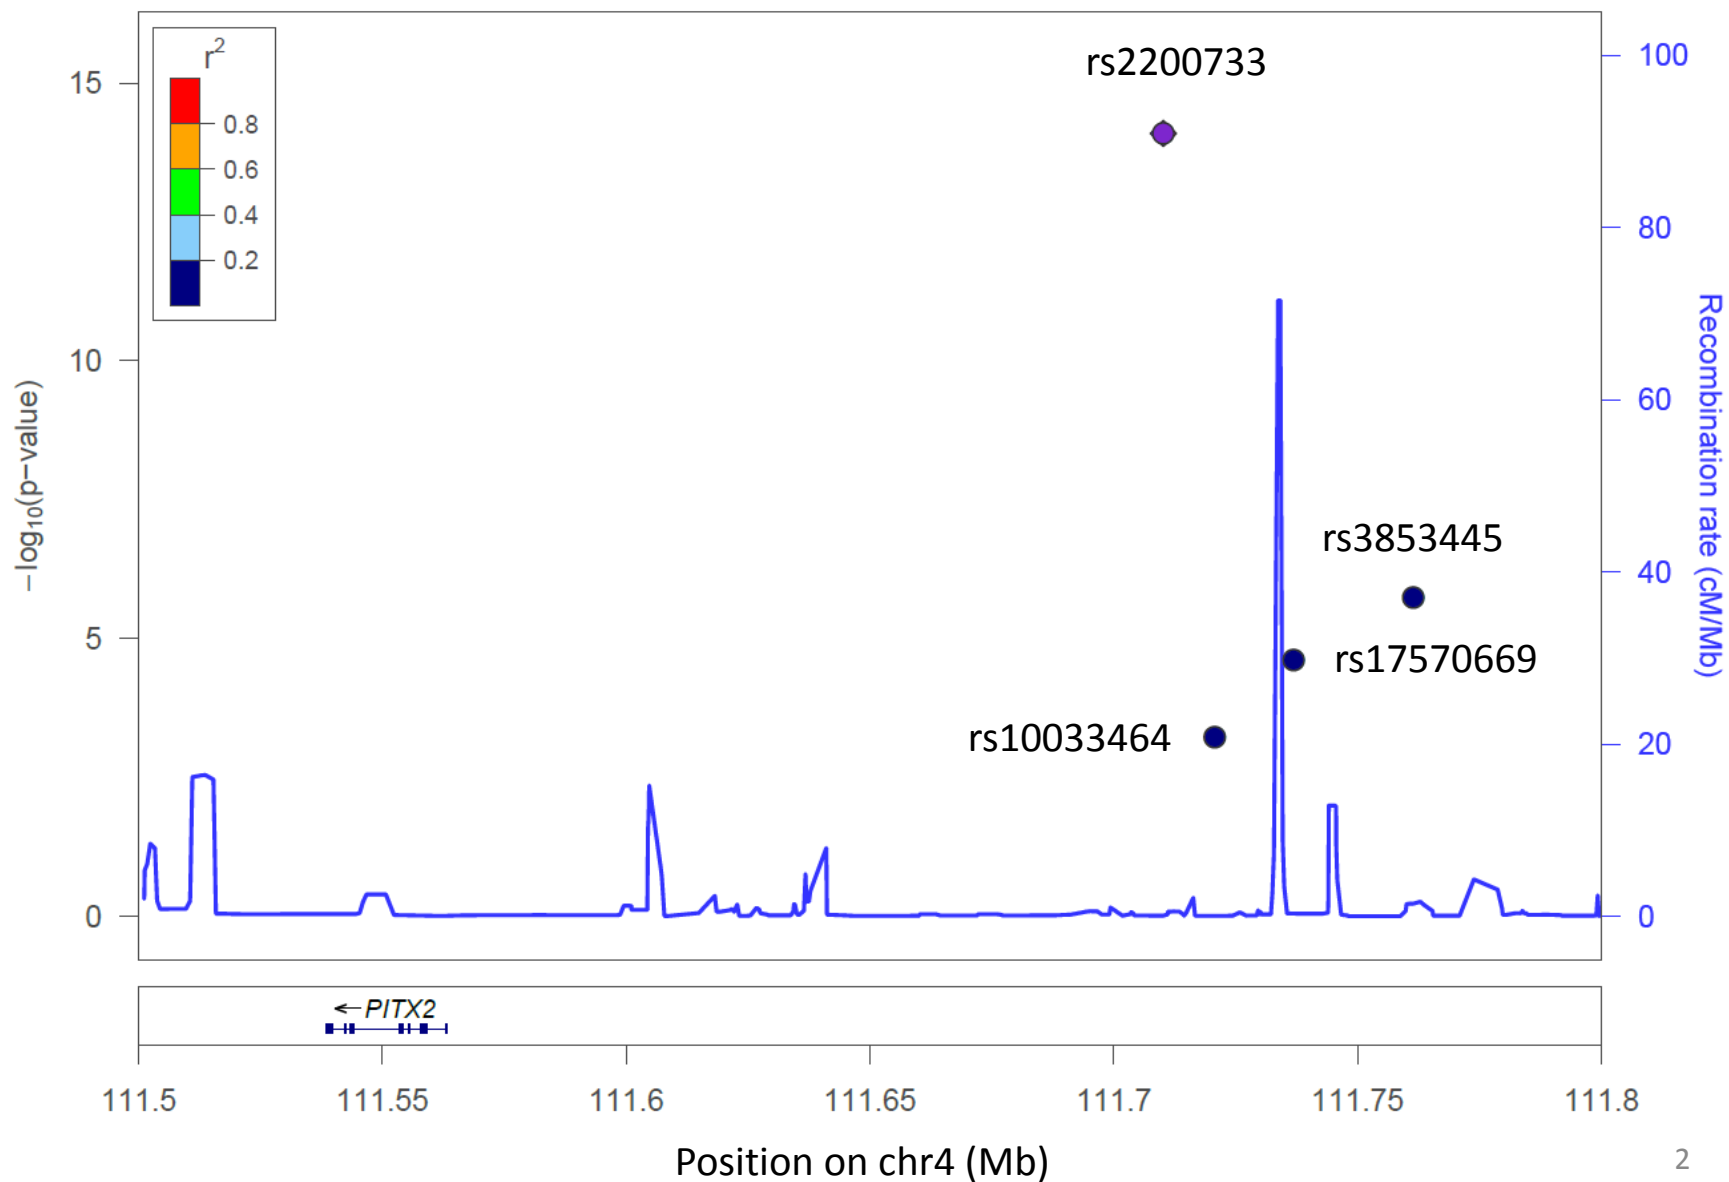

**Supplemental Figure II** . A comparison of risk estimates for the 12 SNPs from the literature versus those observed in the Malmo Diet and Cancer Study

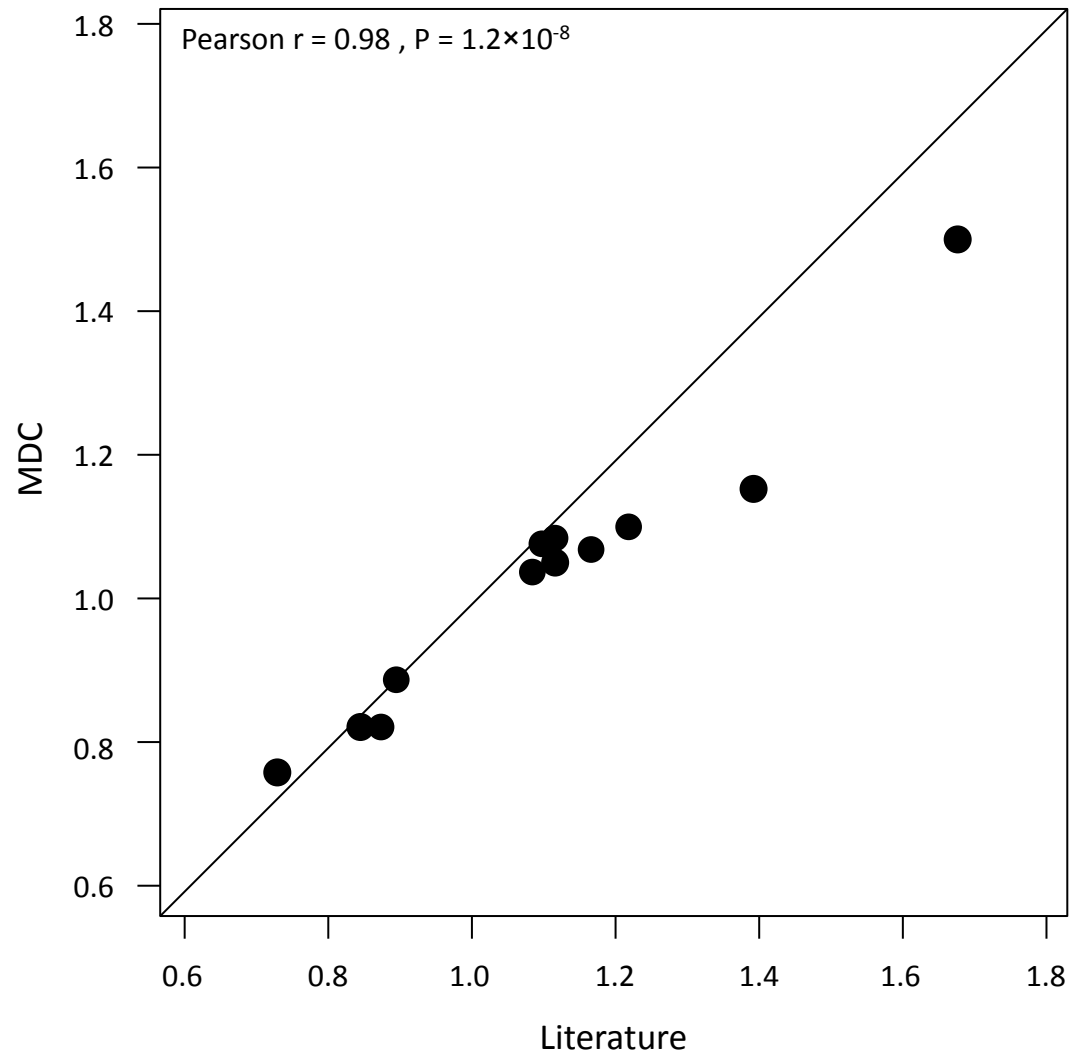

x-axis: Risk estimate from the literature, y-axis: Risk estimate from MDC

### Supplemental Figure III. Cumulative incident atrial fibrillation events according to AF-GRS

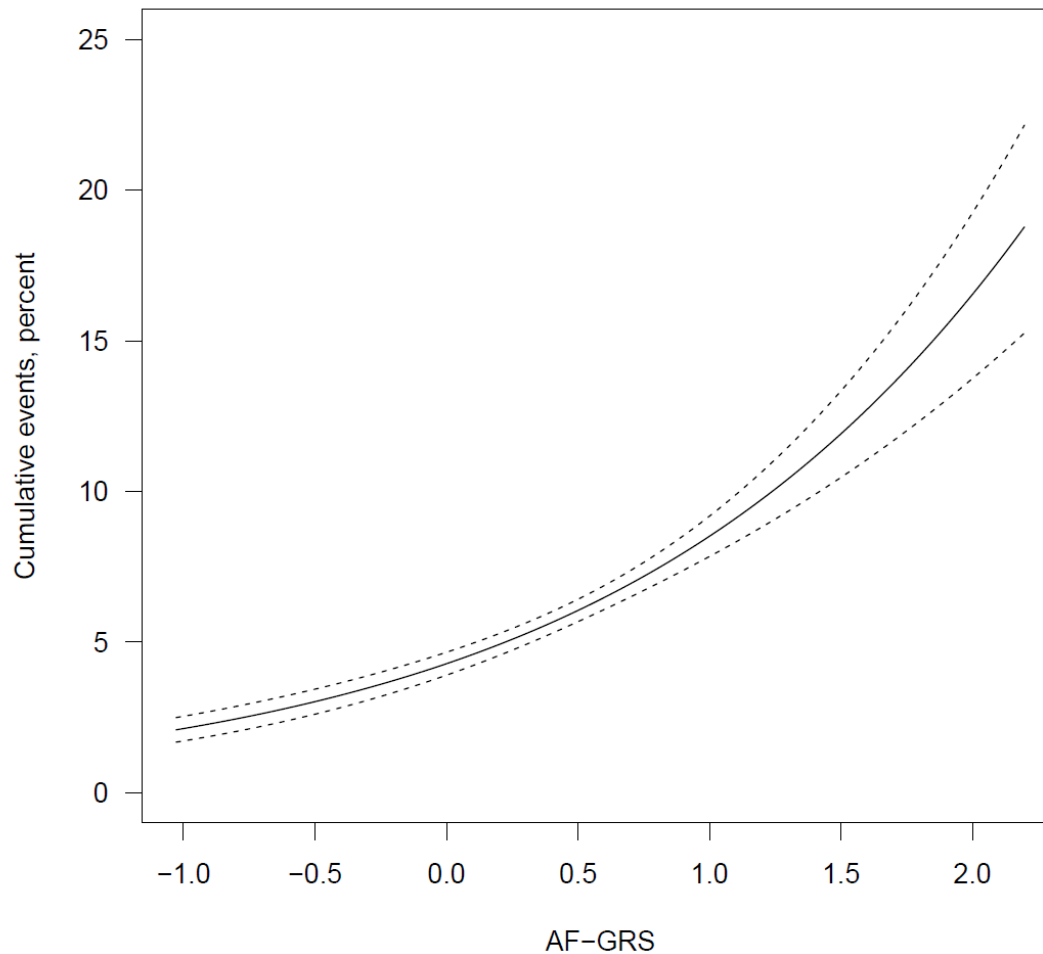

Event rate was adjusted for age, sex, BMI, systolic and diastolic blood pressure, use of antihypertensive medications, current smoking, prevalent diabetes, coronary events, and heart failure. Dotted lines indicate 95% CI the cumulative event rate estimate.

**Supplemental Table I . Linkage disequilibrium ( $r^2$ ) between SNPs in the 4q25 locus**

| SNP        | rs10033464 | rs17570669 | rs3853445 |
|------------|------------|------------|-----------|
| rs2200733  | 0.01       | 0.09       | 0.002     |
| rs10033464 |            | 0.01       | 0.01      |
| rs17570669 |            |            | 0.03      |

**Supplemental Table II . Prevalence and contributed weight of each SNP to the AF-GRS in each GRS-quintile**

| SNP        | Modeled allele | Quintile |         |       |         |       |         |       |         |       |         |
|------------|----------------|----------|---------|-------|---------|-------|---------|-------|---------|-------|---------|
|            |                | 1        |         | 2     |         | 3     |         | 4     |         | 5     |         |
|            |                | Freq.    | Weight  | Freq. | Weight  | Freq. | Weight  | Freq. | Weight  | Freq. | Weight  |
| rs13376333 | T              | 0.231    | 0.0283  | 0.290 | 0.0354  | 0.343 | 0.0420  | 0.383 | 0.0468  | 0.436 | 0.0533  |
| rs3903239  | G              | 0.329    | 0.0431  | 0.421 | 0.0551  | 0.480 | 0.0629  | 0.533 | 0.0699  | 0.577 | 0.0756  |
| rs10033464 | T              | 0.020    | 0.0065  | 0.049 | 0.0161  | 0.074 | 0.0243  | 0.142 | 0.0468  | 0.186 | 0.0614  |
| rs2200733  | T              | 0.014    | 0.0075  | 0.031 | 0.0167  | 0.051 | 0.0278  | 0.110 | 0.0597  | 0.298 | 0.1616  |
| rs17570669 | T              | 0.161    | -0.0506 | 0.067 | -0.0212 | 0.054 | -0.0169 | 0.060 | -0.0189 | 0.048 | -0.0151 |
| rs3853445  | C              | 0.433    | -0.0653 | 0.301 | -0.0454 | 0.226 | -0.0340 | 0.212 | -0.0319 | 0.152 | -0.0230 |
| rs3807989  | A              | 0.516    | -0.0543 | 0.454 | -0.0478 | 0.395 | -0.0416 | 0.352 | -0.0371 | 0.319 | -0.0337 |
| rs10821415 | A              | 0.306    | 0.0319  | 0.368 | 0.0384  | 0.419 | 0.0437  | 0.459 | 0.0479  | 0.489 | 0.0510  |
| rs10824026 | G              | 0.250    | -0.0348 | 0.180 | -0.0250 | 0.137 | -0.0190 | 0.124 | -0.0172 | 0.109 | -0.0152 |
| rs1152591  | A              | 0.358    | 0.0437  | 0.443 | 0.0542  | 0.523 | 0.0640  | 0.543 | 0.0663  | 0.597 | 0.0730  |
| rs7164883  | G              | 0.077    | 0.0133  | 0.133 | 0.0231  | 0.173 | 0.0301  | 0.216 | 0.0377  | 0.267 | 0.0464  |
| rs2106261  | T              | 0.067    | 0.0145  | 0.123 | 0.0265  | 0.160 | 0.0343  | 0.223 | 0.0481  | 0.302 | 0.0651  |

### Supplemental Table III. Risk estimates for atrial fibrillation risk factors

| Risk factor   | HR (95% CI)        | P value                |
|---------------|--------------------|------------------------|
| AF-GRS        | 1.20 (1.16 - 1.24) | $3.8 \times 10^{-28}$  |
| Age           | 1.11 (1.10 - 1.12) | $1.8 \times 10^{-183}$ |
| Male sex      | 1.70 (1.54 - 1.85) | $1.1 \times 10^{-29}$  |
| BMI           | 1.06 (1.05 - 1.07) | $7.2 \times 10^{-24}$  |
| Hypertension  | 1.43 (1.28 - 1.60) | $8.7 \times 10^{-10}$  |
| Smoking       | 1.26 (1.13 - 1.40) | $2.7 \times 10^{-05}$  |
| Diabetes      | 1.32 (1.11 - 1.58) | $1.6 \times 10^{-03}$  |
| CHD           | 1.69 (1.37 - 2.09) | $1.0 \times 10^{-06}$  |
| Heart Failure | 2.10 (1.53 - 2.87) | $3.5 \times 10^{-06}$  |

Risk for AF-GRS is per quintile, age per year, BMI per unit. All other risks are per risk category.

Risk estimates are from a Cox proportional hazards model that included all the variables listed in the table.

Hypertension was defined as systolic blood pressure  $\geq 140$ mmHg, diastolic blood pressure  $\geq 90$ mmHg, or use of antihypertensive medications.

**Supplemental Table IV.** Stroke event rates according to median age, AF-GRS group, and hypertension

| Hypertension | AF-GRS Group* | Ischemic Stroke<br>Event Rate (95%CI) |                     | Likely Cardioembolic Stroke†<br>Event Rate (95%CI) |                    |
|--------------|---------------|---------------------------------------|---------------------|----------------------------------------------------|--------------------|
|              |               | Age < 57.5 years                      | Age ≥ 57.5 years    | Age < 57.5 years                                   | Age ≥ 57.5 years   |
| Yes          | Top           | 2.91 (2.18 - 3.81)                    | 9.01 (7.84 - 10.31) | 0.49 (0.24 – 0.87)                                 | 2.11 (1.62-2.69)   |
| Yes          | Bottom        | 2.48 (1.79 - 3.34)                    | 7.62 (6.59 - 8.76)  | 0.19 (0.05 – 0.47)                                 | 1.04 (0.72 – 1.46) |
| No           | Top           | 1.11 (0.7 - 1.68)                     | 4.06 (2.85 - 5.59)  | 0.20 (0.07 – 0.47)                                 | 1.22 (0.67 – 2.05) |
| No           | Bottom        | 0.83 (0.47 - 1.35)                    | 2.73 (1.74 - 4.06)  | 0.04 (0.00 – 0.23)                                 | 0.28 (0.06 – 0.8)  |

Event rate is per 1,000 person-years.

Hypertension defined as systolic blood pressure ≥140mmHg, diastolic blood pressure ≥90mmHg, or use of antihypertensive medications.

\* Top is top quintile for ischemic stroke events and top quartile for likely cardioembolic stroke events

†Ischemic stroke events that were preceded or coincided with a diagnosis of AF



## Supplemental Table V. Risk of likely cardioembolic stroke in patients with AF

|                  | AF-GRS Quintile |                    |                    |                    |                    | P <sub>trend</sub> |
|------------------|-----------------|--------------------|--------------------|--------------------|--------------------|--------------------|
|                  | 1               | 2                  | 3                  | 4                  | 5                  |                    |
| HR (95%CI)       | Reference       | 1.07 (0.68 - 1.68) | 0.95 (0.60 - 1.52) | 1.03 (0.65 - 1.63) | 1.81 (1.20 – 2.73) | 0.009              |
| P value (vs. Q1) |                 | 0.8                | 0.8                | 0.9                | 0.005              |                    |

Quintile boundaries for patients with AF: 1  $GRS \leq 0.2149$ ; 2  $GRS > 0.2149$  and  $\leq 0.4335$ ; 3  $GRS > 0.4335$  and  $\leq 0.6368$ ; 4  $GRS > 0.6368$  and  $\leq 0.8713$ ; 5  $GRS > 0.8713$ .

Hazard ratios from Cox proportional hazards models adjusted for age, sex, BMI, systolic and diastolic blood pressure, use of antihypertensive
